# Supplementary material for: Design and Molecular Modeling of Abiraterone-Functionalized Gold Nanoparticles
Source: PubMed Central journal article supplement (PMC6164775; doi:10.3390/nano8090641), 2018-08-22
Supplement: nanomaterials-08-00641-s001.pdf [file nanomaterials-08-00641-s001.pdf]

## Supplementary Material

# Design and Molecular Modeling of Abiraterone-Functionalized Gold Nanoparticles

Elżbieta U. Stolarczyk<sup>1,\*</sup>, Marta Łaszcz<sup>1</sup>, Andrzej Leś<sup>1,2</sup>, Marek Kubiszewski<sup>1</sup>,

Krzysztof Kuziak<sup>1</sup>, Katarzyna Sidoryk<sup>3</sup>, Krzysztof Stolarczyk<sup>2</sup>

<sup>1</sup>Pharmaceutical Research Institute, R&D Analytical Department, 8 Rydygiera Str.,  
01-793 Warsaw, Poland

<sup>2</sup>University of Warsaw, Faculty of Chemistry, 1 Pasteura Str., 02-093 Warsaw, Poland

<sup>3</sup>Pharmaceutical Research Institute, Chemistry Department, 8 Rydygiera Str.,  
01-793 Warsaw, Poland

Author to whom correspondence should be addressed:

\* Pharmaceutical Research Institute, R&D Analytical Department, 8 Rydygiera Str., 01-793  
Warsaw, Poland, tel. +48 22 456 3992

e-mail: [e.stolarczyk@ifarm.eu](mailto:e.stolarczyk@ifarm.eu)

### 1. Elements of the validation of the UV-Vis method for the determination of AB residual in the supernatant

Abiraterone UV-Vis spectrum in n-BuOH shows  $\lambda_{\max}$  at 255 nm.

**Linearity:** The calibration curve was obtained in the concentration range from 4  $\mu\text{g/mL}$  – 50  $\mu\text{g/mL}$ . For each concentration three repetitions were performed for the average result. Three

replicate injections were made for each concentration and the average result was reported. The response of abiraterone was found to be linear in the investigated concentration range and the linear regression equation was  $y = 0.028x - 0.0069$  with the correlation coefficient equal 0.9997 (Table S1, Figure S1).

**Table S1.** Results of the method linearity test.

| <b>Linearity of the abiraterone determination</b> |                                                   |            |                              |               |                  |                  |
|---------------------------------------------------|---------------------------------------------------|------------|------------------------------|---------------|------------------|------------------|
| <b>Solution No.</b>                               | <b>Concentration, <math>\mu\text{g/mL}</math></b> | <b>Abs</b> | <b>Mean Absorbance (Abs)</b> | <b>SD Abs</b> | <b>RSD Abs %</b> | <b>Abs /Conc</b> |
| 1                                                 | 4.0                                               | 0.114      | 0.114                        | 0.0000        | 0.00             | 0.029            |
|                                                   |                                                   | 0.114      |                              |               |                  | 0.029            |
|                                                   |                                                   | 0.114      |                              |               |                  | 0.029            |
| 2                                                 | 5.0                                               | 0.138      | 0.137                        | 0.0010        | 0.73             | 0.028            |
|                                                   |                                                   | 0.136      |                              |               |                  | 0.027            |
|                                                   |                                                   | 0.137      |                              |               |                  | 0.027            |
| 3                                                 | 10.1                                              | 0.269      | 0.270                        | 0.0006        | 0.22             | 0.027            |
|                                                   |                                                   | 0.270      |                              |               |                  | 0.027            |
|                                                   |                                                   | 0.270      |                              |               |                  | 0.027            |
| 4                                                 | 20.1                                              | 0.551      | 0.551                        | 0.0000        | 0.00             | 0.027            |
|                                                   |                                                   | 0.551      |                              |               |                  | 0.027            |
|                                                   |                                                   | 0.551      |                              |               |                  | 0.027            |
| 5                                                 | 30.2                                              | 0.834      | 0.834                        | 0.0006        | 0.07             | 0.028            |
|                                                   |                                                   | 0.833      |                              |               |                  | 0.028            |
|                                                   |                                                   | 0.834      |                              |               |                  | 0.028            |
| 6                                                 | 40.2                                              | 1.112      | 1.110                        | 0.0021        | 0.19             | 0.028            |
|                                                   |                                                   | 1.109      |                              |               |                  | 0.028            |
|                                                   |                                                   | 1.108      |                              |               |                  | 0.028            |
| 7                                                 | 50.3                                              | 1.414      | 1.414                        | 0.0000        | 0.00             | 0.028            |
|                                                   |                                                   | 1.414      |                              |               |                  | 0.028            |
|                                                   |                                                   | 1.414      |                              |               |                  | 0.028            |
|                                                   |                                                   |            |                              |               | <b>Mean</b>      | 0.028            |
|                                                   |                                                   |            |                              |               | <b>SD</b>        | 0.001            |
|                                                   |                                                   |            |                              |               | <b>RSD</b>       | 1.991            |

| Table: Analysis of the linear regression $y = 0.0281x - 0.0069$ |                                                                                                             |        |
|-----------------------------------------------------------------|-------------------------------------------------------------------------------------------------------------|--------|
| $R^2$                                                           |                                                                                                             | 0.9997 |
| Number of data                                                  |                                                                                                             | 7.00   |
| Standard deviation $SD_{xy}$                                    |                                                                                                             | 0.009  |
| Coefficient a (slope):                                          |                                                                                                             |        |
|                                                                 | a                                                                                                           | 0.028  |
|                                                                 | Standard deviation<br>$SD_a$                                                                                | 0.0002 |
|                                                                 | $t_a =  a /SD_a$                                                                                            | 135.16 |
|                                                                 | $t_{cr}(a=0.05: f=n-2)$                                                                                     | 2.57   |
| <b>Conclusion</b>                                               | $t_a \gg t_{cr}$<br><b>Coefficient <math>a</math> is significant, the method is sensitive</b>               |        |
| Coefficient b (y-intercept):                                    |                                                                                                             |        |
|                                                                 | b                                                                                                           | -0.007 |
|                                                                 | Standard deviation<br>$SD_b$                                                                                | 0.006  |
|                                                                 | $t_b =  b /SD_b$                                                                                            | 1.183  |
|                                                                 | $t_{cr}(a=0.05: f=n-2)$                                                                                     | 2.57   |
| <b>Conclusion</b>                                               | $t_b < t_{cr}$<br><b>Coefficient <math>b</math> is not significant, the method has no systematic errors</b> |        |
| Coefficient r:                                                  |                                                                                                             |        |
|                                                                 | r                                                                                                           | 0.9999 |
|                                                                 | r sq                                                                                                        | 0.9997 |
|                                                                 | $tr = r/\sqrt{(1-r^2)} \times \sqrt{(n-2)}$                                                                 | 135.16 |
|                                                                 | $t_{cr}(a=0.05: f=n-2)$                                                                                     | 2.57   |
| <b>Conclusion</b>                                               | $tr \gg t_{cr}$<br><b>Coefficient <math>r</math> is significant, the method is linear</b>                   |        |

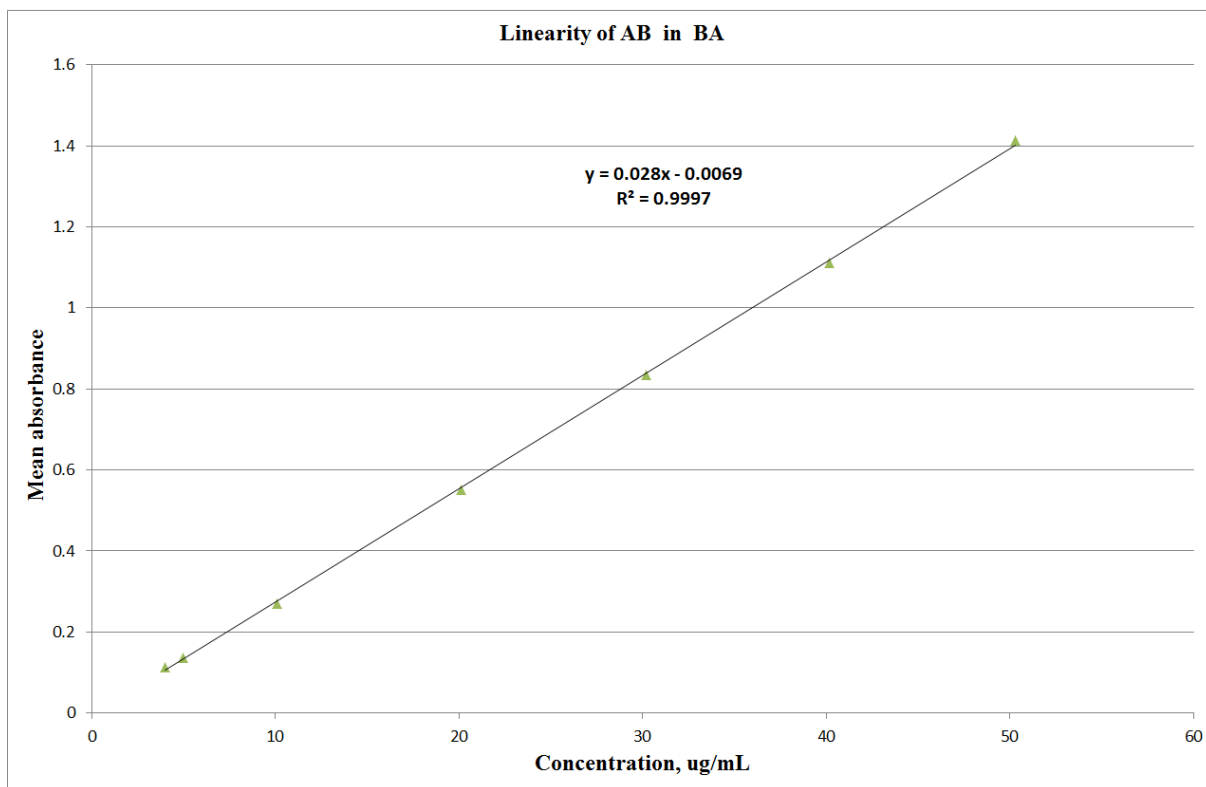

Figure S1. Linearity of the abiraterone determination.

**Precision:** precision was evaluated by measuring the response of six replicate solutions with the analytes at 50  $\mu\text{g/mL}$  (Table S2).

Table S2. Results of the precision test for abiraterone.

| Sample No.   | AB    |                        |
|--------------|-------|------------------------|
|              | Abs   | $\lambda_{\text{max}}$ |
| 1            | 1.409 | 254.669                |
| 2            | 1.407 | 254.369                |
| 3            | 1.410 | 254.888                |
| 4            | 1.408 | 254.755                |
| 5            | 1.408 | 254.725                |
| 6            | 1.408 | 254.415                |
| <b>Mean</b>  | 1.408 | 254.637                |
| <b>SD</b>    | 0.001 | 0.20337                |
| <b>RSD %</b> | 0.073 | 0.079                  |

**The limit of detection (LOD):** LOD is defined as the lowest concentration of an analyte that an analytical process can reliably differentiate from the back-ground levels. Solutions of different lowering concentrations of AB were analysed.

**The limit of quantification (LOQ):** LOQ is defined as the lowest concentration of the standard that can be measured with an acceptable precision and linearity. Solutions of different lowering concentrations of AB were analysed. The precision of the LOQ level was established by measuring the response of six replicate measurements of the LOQ solution for AB (Table S3) .

**Detection and quantification limits** were found to be 3  $\mu\text{g}/\text{mL}$  and 4  $\mu\text{g}/\text{mL}$ , respectively.

**Table S3.** Results for the examined LOQ solutions.

| Sample No.   | AB    |                        |
|--------------|-------|------------------------|
|              | Abs   | $\lambda_{\text{max}}$ |
| 1            | 0.114 | 254.594                |
| 2            | 0.114 | 254.167                |
| 3            | 0.114 | 254.618                |
| 4            | 0.114 | 254.126                |
| 5            | 0.114 | 254.448                |
| 6            | 0.114 | 254.680                |
| <b>Mean</b>  | 0.114 | 254.4388               |
| <b>SD</b>    | 0     | 0.239241               |
| <b>RSD %</b> | 0     | 0.094027               |

## 2. Theoretical studies

The selected geometry parameters are collected in Table S4. An interesting feature of the small  $\text{Au}_n$  clusters is their irregular (non-symmetrical) structure, except for  $\text{Au}_{20}$  which is close to a tetrahedral structure.

**Table S4.** Jmol structures of AB acetate and its complexes with Au clusters.

|                                                                                     |
|-------------------------------------------------------------------------------------|
| AB                                                                                  |
| 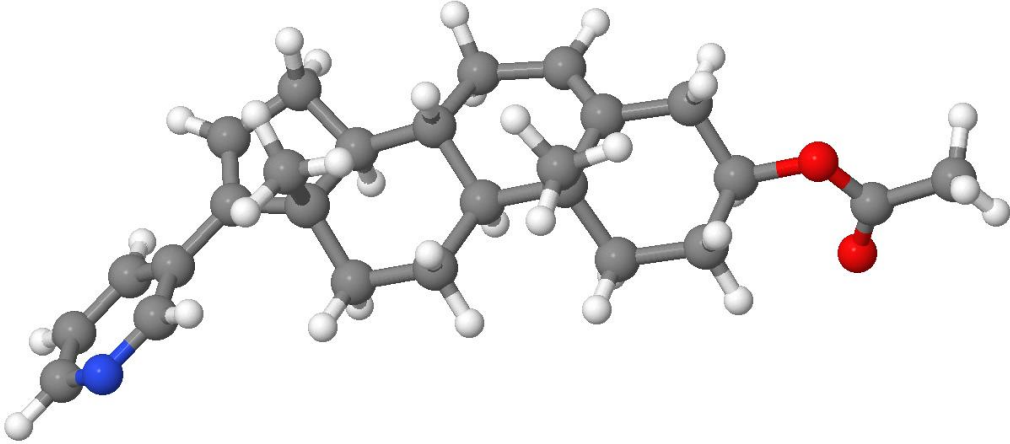  |
| Au <sub>5</sub>                                                                     |
|   |
| Au <sub>8</sub>                                                                     |
|  |
| Au <sub>13</sub>                                                                    |

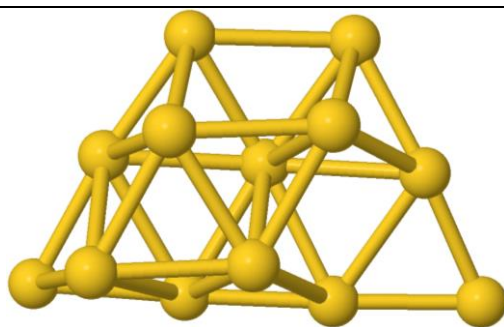

Au<sub>20</sub>

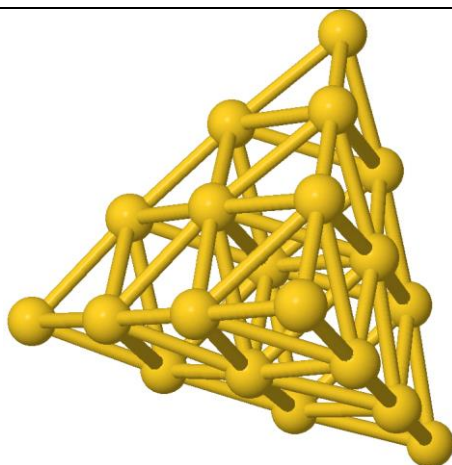

AuNPs-(N)AB acetate for Au<sub>5</sub>

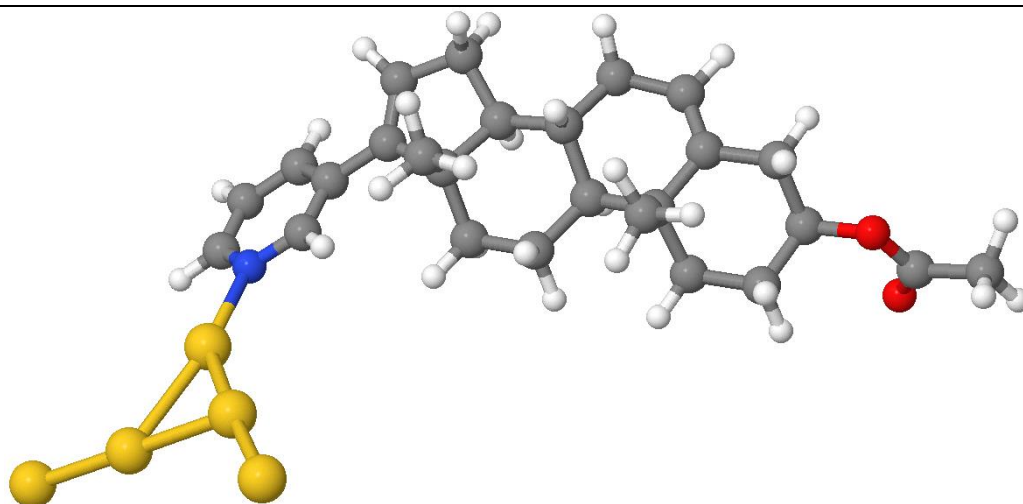

AuNPs-(O)AB acetate

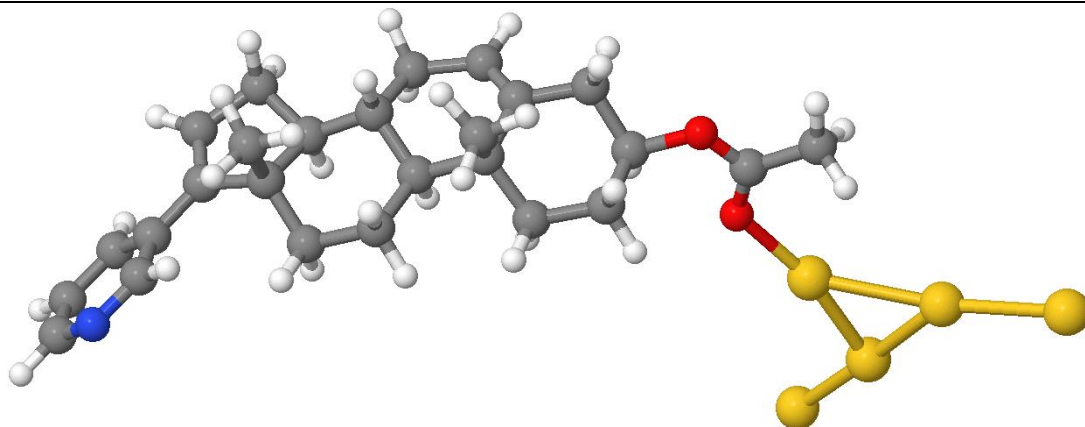

Jmol structures of AB and its complexes with Au clusters

AB

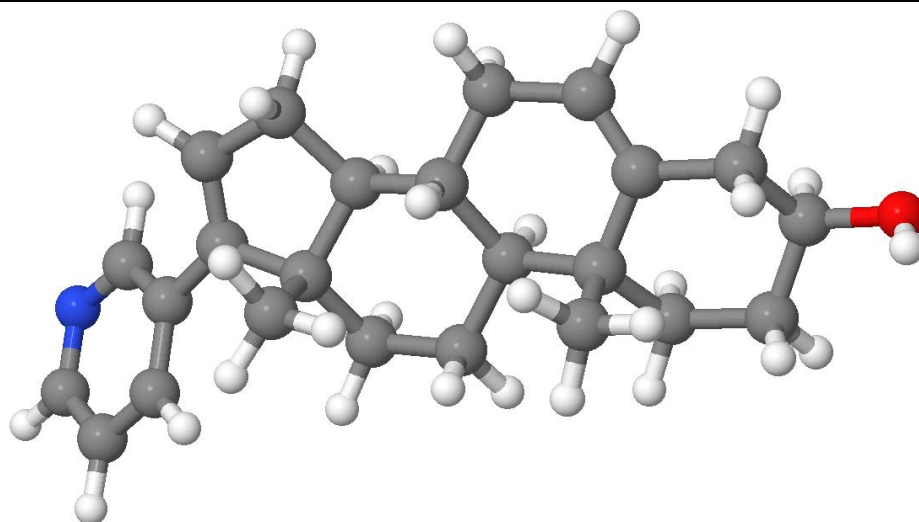

AuNPs-(N)AB for Au<sub>5</sub>

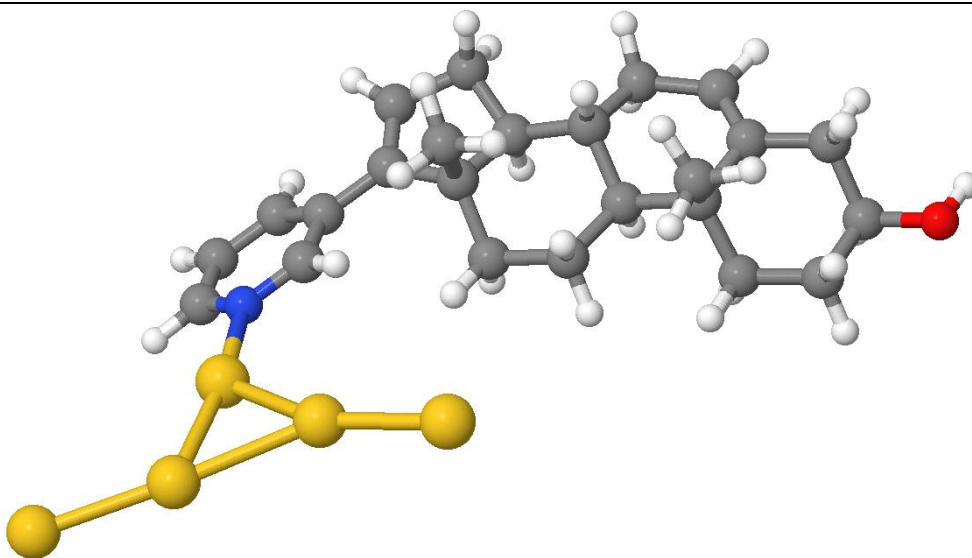



AuNPs-(N)AB for Au<sub>13</sub>

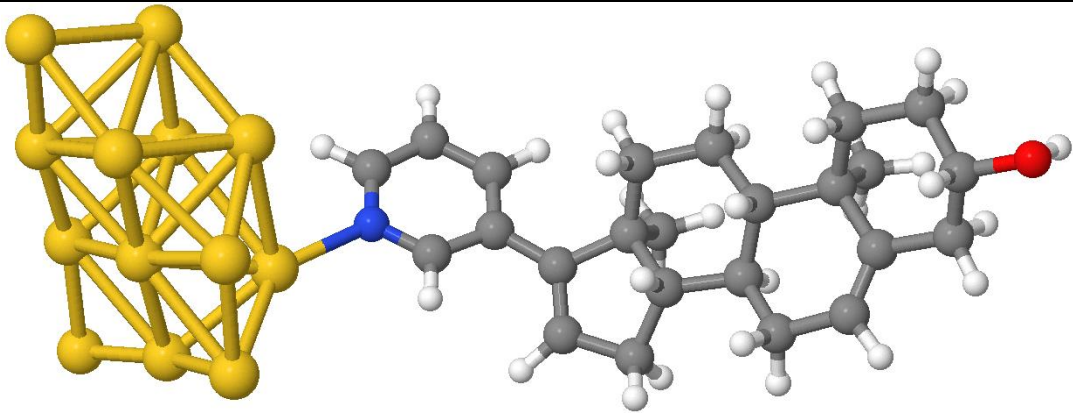

AuNPs-(OH)AB for Au<sub>13</sub>

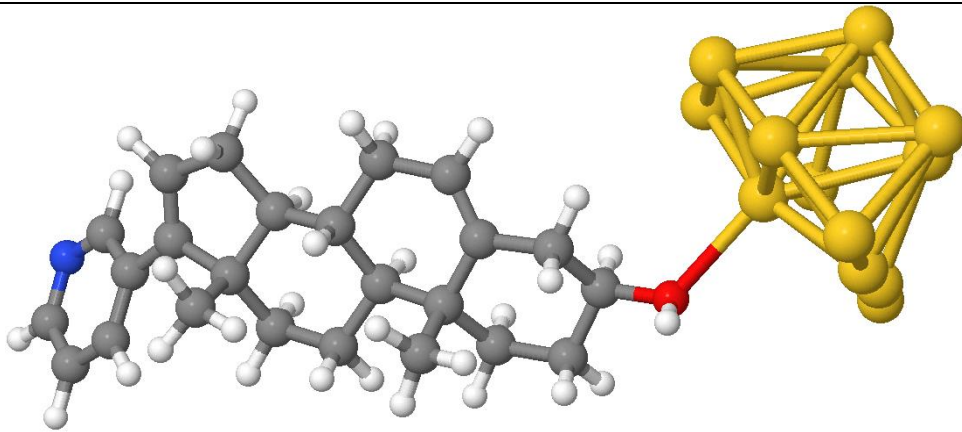

Footnote to Table S4. Distances between neighbouring atoms, in nm, in the Au<sub>n</sub> clusters predicted with the present theoretical calculations.

| Au <sub>n</sub>  | Distances |
|------------------|-----------|
| Au <sub>5</sub>  | 26.2-27.9 |
| Au <sub>8</sub>  | 27.0-28.7 |
| Au <sub>13</sub> | 27.0-30.2 |
| Au <sub>20</sub> | 27.3-32.1 |

**Table S5.** Intermolecular interaction energies of the Au<sub>n</sub>-abiraterone conjugates calculated with the use of the counterpoise correction. The A symbol corresponds to Au<sub>n</sub>, while the B symbol to the abiraterone molecule (neutral/protonated/acetated) or to its reduced models.

| Conjugate                         | E(AB)                                      | E(A)         | E(B)         | Eint<br>[kcal/m<br>ol] | Eint<br>[kJ/mol] |
|-----------------------------------|--------------------------------------------|--------------|--------------|------------------------|------------------|
| <b>Au<sub>n</sub>-abiraterone</b> |                                            |              |              |                        |                  |
| Au <sub>5</sub> -(N)abiraterone   | -1740.655750<br>-1740.229974 <sup>1)</sup> | -677.410718  | -1063.201028 | -27.6                  | -115.5           |
| Au <sub>5</sub> -(OH)abiraterone  | -1740.638319<br>-1740.213932 <sup>1)</sup> | 677.412515   | -1063.202718 | -14.5                  | -60.6            |
| Au <sub>13</sub> -(N)abiraterone  | -2824.694197<br>-2824.301587 <sup>1)</sup> | -1761.462732 | -1063.202378 | -18.25                 | -76.37           |
| Au <sub>13</sub> -(OH)abiraterone | -2824.684597                               | -1761.466530 | -1063.204306 | -8.6                   | -36.1            |

|                                                      |                                            |              |              |        |        |
|------------------------------------------------------|--------------------------------------------|--------------|--------------|--------|--------|
|                                                      | -2824.286120 <sup>1)</sup>                 |              |              |        |        |
| <b>Reduced models</b>                                |                                            |              |              |        |        |
| Au <sub>13</sub> -(N)pyridine                        | -2009.783477                               | -1761.463578 | -248.292406  | -17.3  | -72.2  |
| Au <sub>13</sub> -<br>(OH)cyclohexenol               | -2071.354302                               | -1761.467800 | -309.878060  | -5.3   | -22.2  |
| Au <sub>20</sub> -(N)pyridine <sup>2)</sup>          | -2958.376778                               | -2710.108047 | -248.239413  | -18.4  | -77.0  |
| Au <sub>20</sub> -<br>(OH)cyclohexenol <sup>2)</sup> | -3019.945856                               | -2710.107951 | -309.823240  | -9.2   | -38.5  |
| <b>Charged models</b>                                |                                            |              |              |        |        |
| [Au <sub>5</sub> -(NH)abiraterone] <sup>(+)</sup>    | -1741.036293<br>-1740.600857 <sup>1)</sup> | -677.436509  | -1063.587416 | -7.8   | -32.5  |
| [Au <sub>5</sub> -(OH)abiraterone] <sup>(+)</sup>    | -1741.022991<br>-1740.581909 <sup>1)</sup> | -677.411926  | -1063.590688 | -12.8  | -53.5  |
| <b>Au<sub>n</sub>-abiraterone acetate</b>            |                                            |              |              |        |        |
| Au <sub>5</sub> -(N)abiraterone<br>acetate           | -1893.322625<br>-1892.848745 <sup>1)</sup> | -677.412495  | -1215.868885 | -25.9  | -108.3 |
| Au <sub>5</sub> -(O=C)abiraterone<br>acetate         | -1893.306051<br>-1892.848745 <sup>1)</sup> | -677.412122  | -1215.868551 | -15.92 | -66.6  |

1) The sum of electronic and thermal free energy

2) Calculations using smaller Gaussian basis set D95V [20]

### 3. Lyophilized mixtures

#### 3.1. Abiraterone acetate

##### 3.1.1. XRPD studies

The diffractogram of the lyophilized mixture is characterised by sharp peaks in the range of  $5 - 35^\circ$  and broad peaks in the range of  $35 - 85^\circ$  (Figure S2). Identification of the crystalline phases in the mixture diffractogram proved that the sharp peaks belong to the AB acetate phase and the broad peaks belong to the Au phase (PDF no 04-0784) [14]. The presence of AB acetate in the mixture is confirmed by the comparison of the mixture diffractogram with a simulated diffractogram of AB acetate [19]. Broad Au peaks indicate small sizes of the crystallites. The FWHM value for the Au (111) peak at  $38.2^\circ$  is  $1.4^\circ$ . The average size of the Au crystallites estimated from the Scherrer formula for this peak is about 6 nm.

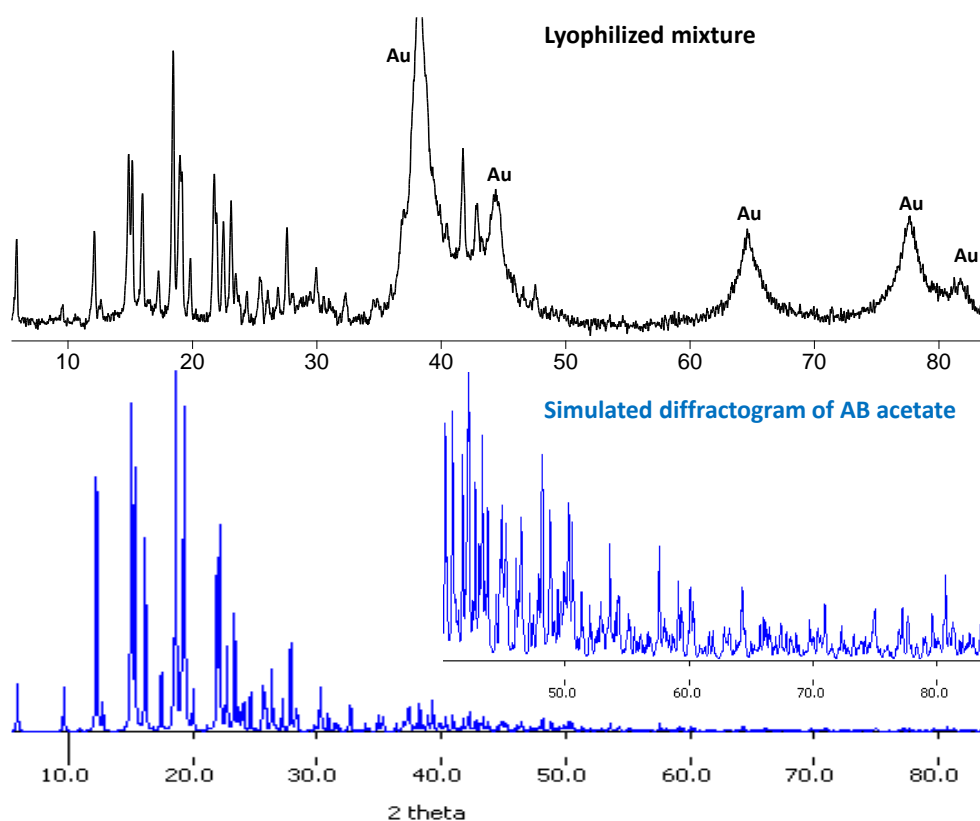

**Figure S2.** Identification of the crystalline phases in the lyophilized mixture.

Upper window: a mixture diffractogram, Au peaks are indicated.

Below: the simulated diffractogram of AB acetate, an insert: a magnification of low intensity peaks range.

## 4. NP-based system

### 4.1. AuNPs-AB acetate

#### 4.1.1. XRPD

Figure S3 shows a diffractogram of the AuNPs–AB acetate conjugate. The lack of the AB acetate diffraction peaks suggests its presence in the amorphous content. Broad Au diffraction peaks are best visible. The FWHM value of the Au (111) peak is  $0.6^\circ$ . An average size of the Au crystallites estimated from the Scherrer formula for this peak is about 14 nm.

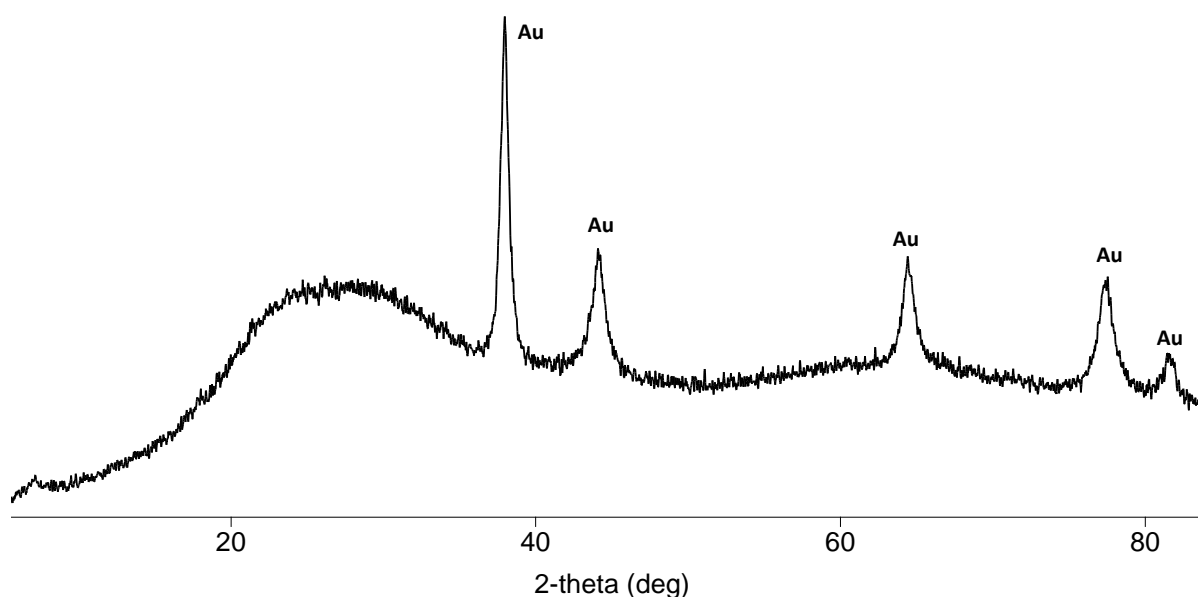

**Figure S3.** A diffractogram of the AuNPs–AB acetate conjugate.

#### 4.1.2. Raman

Figure S4 shows a comparison of the theoretical Raman spectra of AB acetate as well as the Au<sub>5</sub>–(N)AB acetate and Au<sub>5</sub>–(O)AB acetate conjugate in the range from 1800 to 1000  $\text{cm}^{-1}$ . This comparison demonstrates that the same band is observed in the three spectra at

about  $1740\text{ cm}^{-1}$ , coming from the C=C (B) stretching vibrations. Substantial differences occur in the ranges of  $1700 - 1600\text{ cm}^{-1}$  and in  $1100 - 1000\text{ cm}^{-1}$ .

In the spectrum of  $\text{Au}_5\text{-(O)AB}$  acetate a characteristic band at  $1692\text{ cm}^{-1}$ , originating from the C=O stretching vibrations, is observed. In all studied spectra the band at about  $1660\text{ cm}^{-1}$  comes from the collaborative stretching vibrations of mainly C=C (D) bond and the pyridine ring. The band at about  $1640\text{ cm}^{-1}$  comes from the stretching vibrations of the pyridine ring in the AB acetate spectrum, but in the nanoparticle spectra this band comes from the collaborative vibrations of the pyridine ring and the C=C (D) bond.

In the range of  $1100\text{--}1000\text{ cm}^{-1}$  a very intensive band at  $1045\text{ cm}^{-1}$  is observed, in the spectrum of  $\text{Au}_5\text{-(N)AB}$  acetate, originating from the pyridine ring vibrations. In the spectra of AB acetate and  $\text{Au}_5\text{-(O)AB}$  acetate the band at  $1040\text{ cm}^{-1}$  comes from the AB acetate molecule vibrations. The description of the spectra is summarised in Table S6.

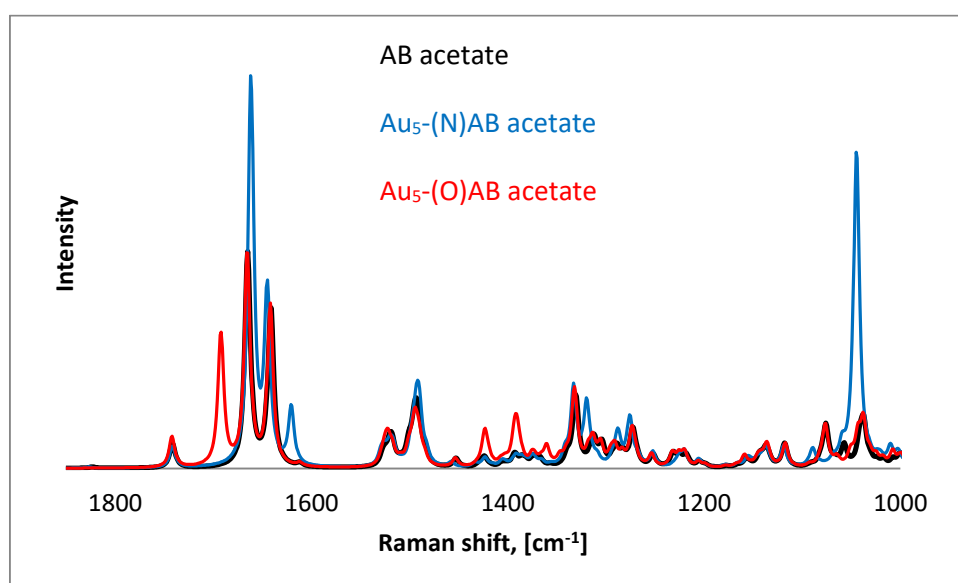

**Figure S4.** A comparison of the theoretical Raman spectra of AB acetate and the nanoparticles of  $\text{Au}_5\text{-(N)AB}$  acetate and  $\text{Au}_5\text{-(O)AB}$  acetate in the range from  $1800$  to  $1000\text{ cm}^{-1}$ .

**Table S6.** A description of the characteristic bands in the theoretical spectra of AB acetate and the nanoparticles of Au<sub>5</sub>–(N)AB acetate and Au<sub>5</sub>–(O)AB acetate.

| <b>AB</b>                         |                              | <b>Au<sub>5</sub>–(N)AB acetate</b> |                                                                | <b>Au<sub>5</sub>–(O)AB acetate</b> |                              |
|-----------------------------------|------------------------------|-------------------------------------|----------------------------------------------------------------|-------------------------------------|------------------------------|
| Raman shifts, (cm <sup>-1</sup> ) |                              |                                     |                                                                |                                     |                              |
| 1824                              | C=O                          | --                                  | --                                                             | --                                  | --                           |
| 1742                              | C=C (B)                      | 1742                                | C=C (B)                                                        | 1742                                | C=C (B)                      |
| --                                | --                           | --                                  | --                                                             | 1692                                | C=O                          |
| 1665                              | mainly C=C (D)<br>+ pyridine | 1662                                | mainly C=C (D)<br>+ pyridine                                   | 1666                                | mainly C=C (D)<br>+ pyridine |
| 1641                              | Pyridine ring                | 1645                                | mainly pyridine<br>+ C=C (D)                                   | 1642                                | mainly pyridine<br>+ C=C (D) |
| --                                | --                           | 1621                                |                                                                | --                                  | --                           |
| 1076                              | whole AB<br>acetate molecule | 1069                                | steroid moiety<br>with acetate<br>without the<br>pyridine ring | 1076                                | whole AB acetate<br>molecule |
| 1036                              | whole AB<br>acetate molecule | 1045                                | pyridine                                                       | 1038                                | whole AB acetate<br>molecule |

Experimental Raman spectra of AB acetate and the AuNPs–AB acetate conjugate are compared in Figure S5. The experimental spectrum of AB acetate is similar to the calculated one.

The experimental spectrum of the AuNPs–AB acetate conjugate is characterised by very broad bands at about 1579, 1446, 1378, 1310, 1264, and 1142  $\text{cm}^{-1}$ . One characteristic intense narrow band at 1028  $\text{cm}^{-1}$  is observed. This band is shifted 4  $\text{cm}^{-1}$  into higher wavenumbers in comparison with its counterpart in the experimental AB acetate spectrum which indicates an interaction between the AuNPs and AB acetate. The direction of this shift agrees well with theoretical predictions, but it is difficult to conclude on the manner of the interaction because the experimental spectrum of AuNPs–AB acetate is characterised by very broad bands in the range of 1800–1500  $\text{cm}^{-1}$ .

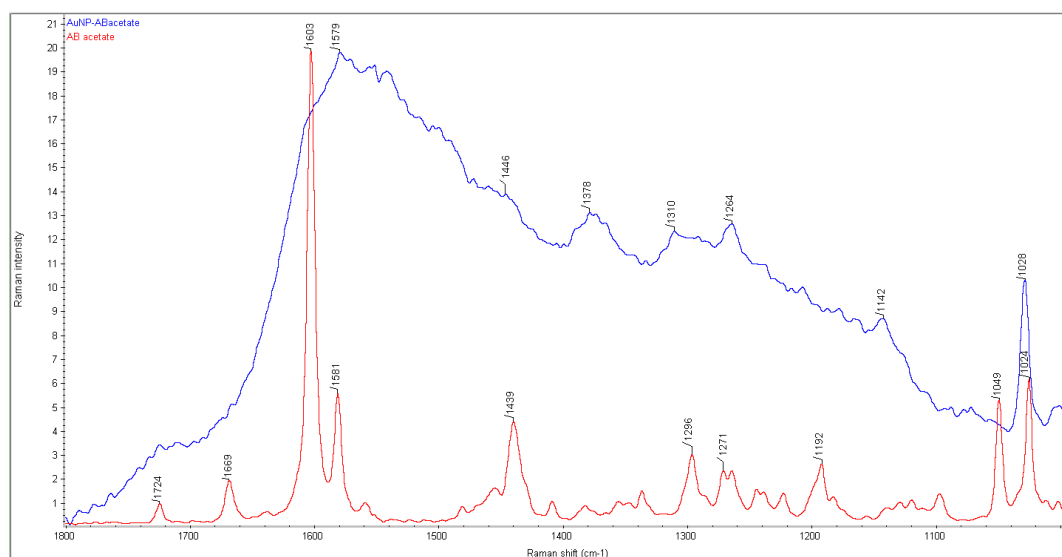

**Figure S5.** A comparison of the experimental Raman spectra of AB acetate (red spectrum) and AuNPs–AB acetate (blue spectrum).



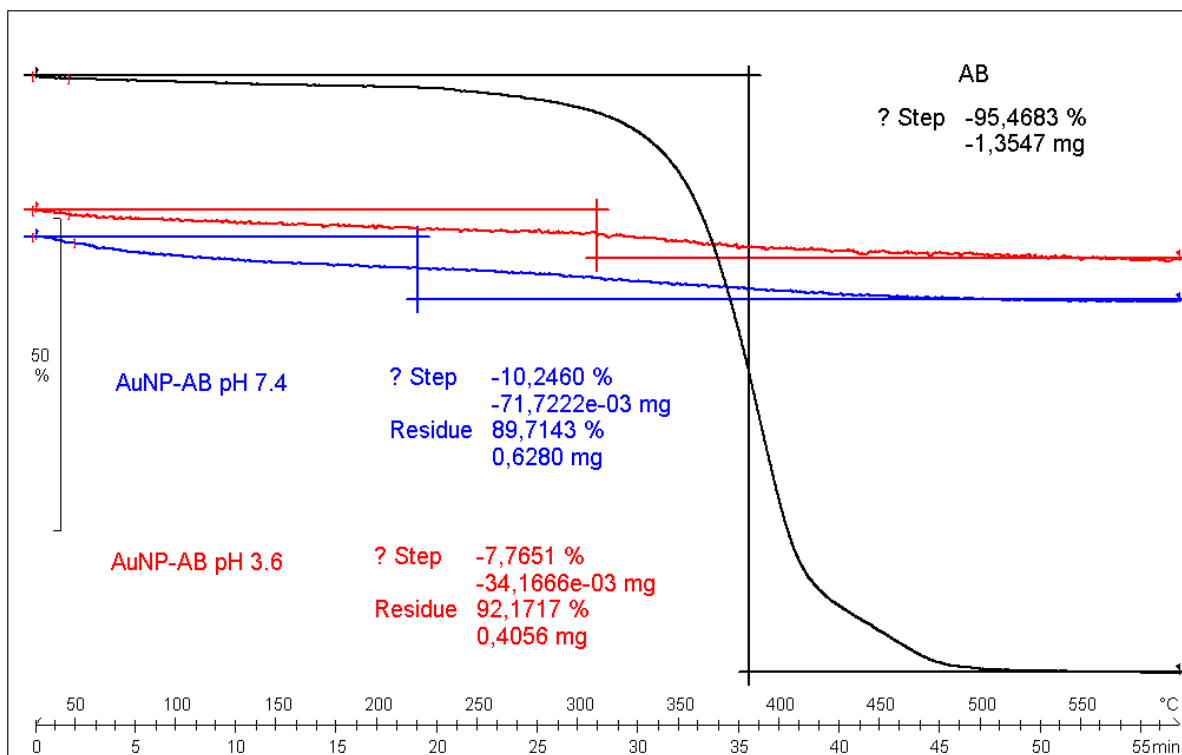

Figure S6. TGA curves of AB and the nanoparticles.
